# Supplementary material for: An electrochemically reduced ultra-high mass loading three-dimensional carbon nanofiber network: a high energy density symmetric supercapacitor with a reproducible and stable cell voltage of 2.0 V
Source: Royal Society of Chemistry journal article supplement (doi:10.1039/d1nr05943b), 2021-01-01
Supplement: d1nr05943b1.pdf [file d1nr05943b1.pdf]

## **Supplementary Information**

### **Electrochemically Reduced Ultra-high Mass Loading Three-Dimensional Carbon Nanofibers Network: A Reproducible and Stable Cell Voltage of 2.0 V and High Energy Density Symmetric Supercapacitor**

***Gunendra Prasad Ojha*<sup>a, b</sup>, *Bishweshwar Pant*<sup>a, b</sup>, *Jiwan Acharya*<sup>a, b</sup>, and *Mira Park*<sup>a b\*</sup>,**

<sup>a</sup>*Carbon Composite Energy Nanomaterials Research Center, Woosuk University, 443 Samnye-ro,  
Samnye-eup, Wanju-gun, Chonbuk, Jeollabuk-do 55338, Republic of Korea.*

<sup>b</sup>*Woosuk Institute of Smart Convergence Life Care (WSCLC), Woosuk University, 443 Samnye-ro,  
Samnye-eup, Wanju-gun, Chonbuk, Jeollabuk-do 55338, Republic of Korea*

**\*Corresponding Author: [wonderfulmira@woosuk.ac.kr](mailto:wonderfulmira@woosuk.ac.kr) (M. Park)**

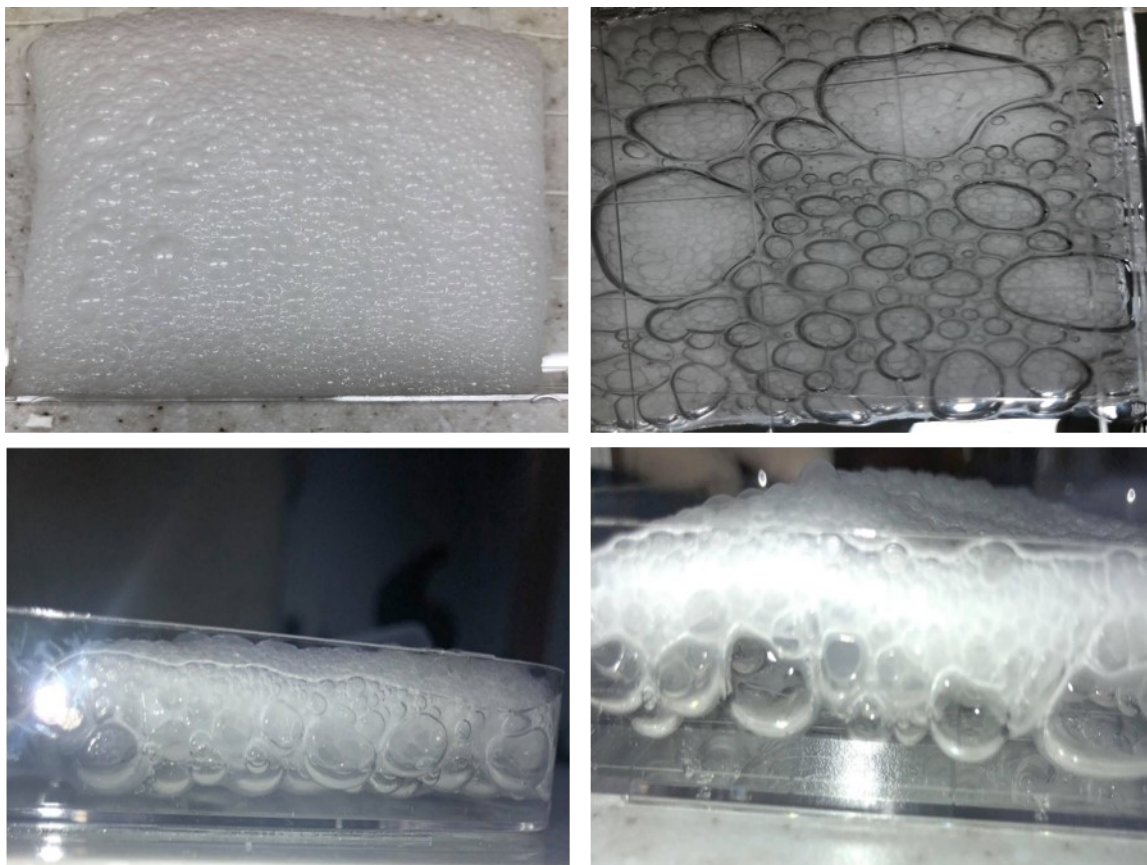

*Figure S1. Digital images of 3D mat during  $\text{NaBH}_4$  treatment.*

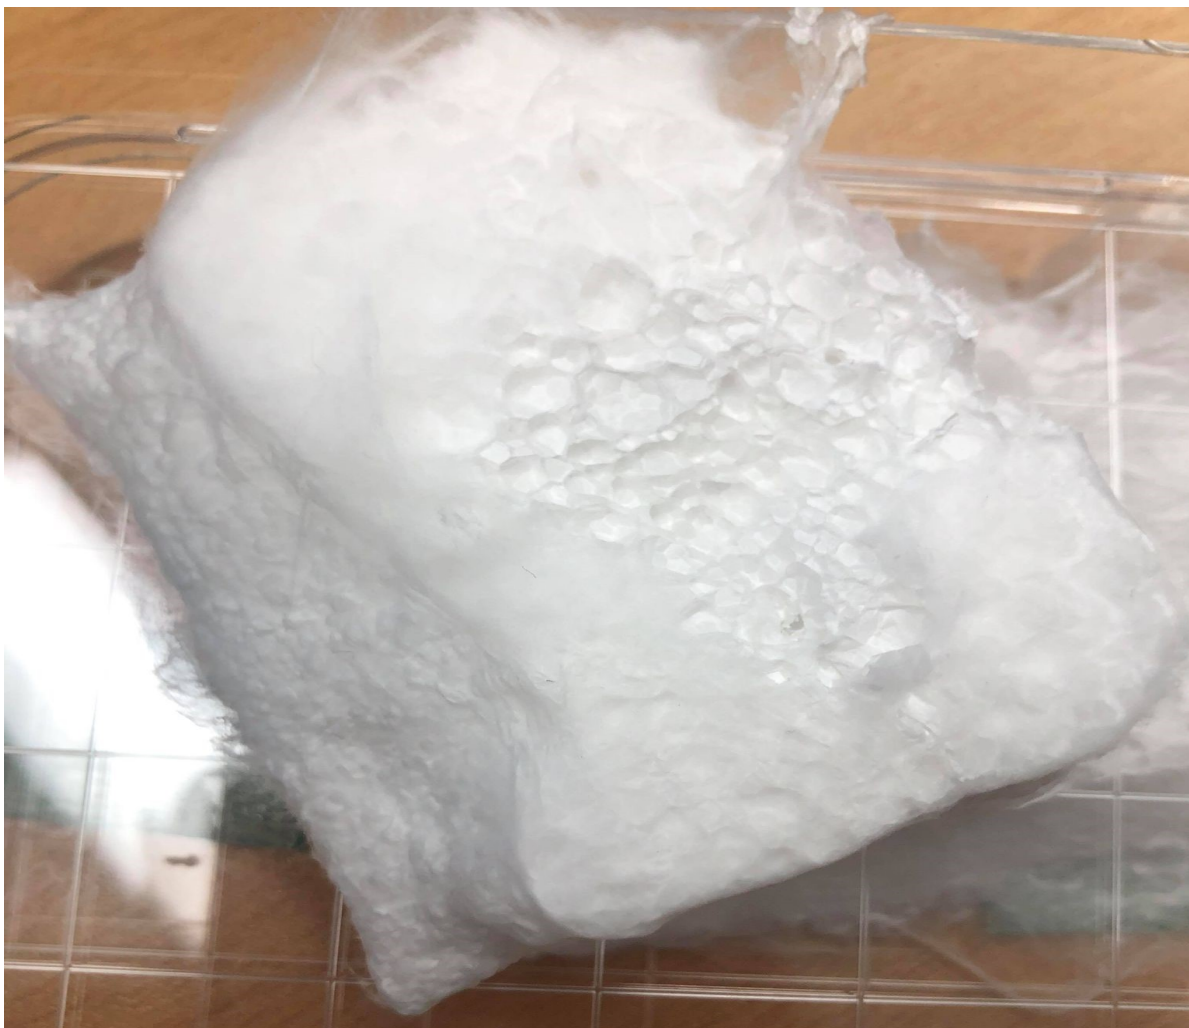

***Figure S2.*** Digital image of 3D mat after freeze-dry.

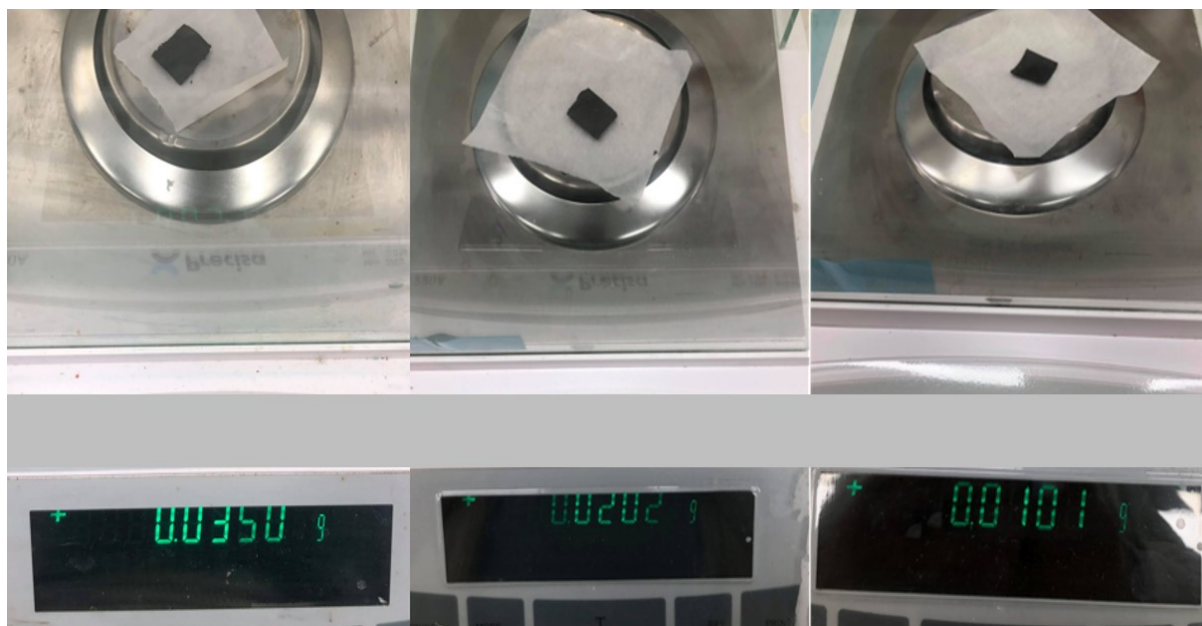

*Figure S3. Digital photographs showing their representative mass loading (35, 20, and 10  $\text{mgcm}^{-2}$ .) of the fabricated electrodes*

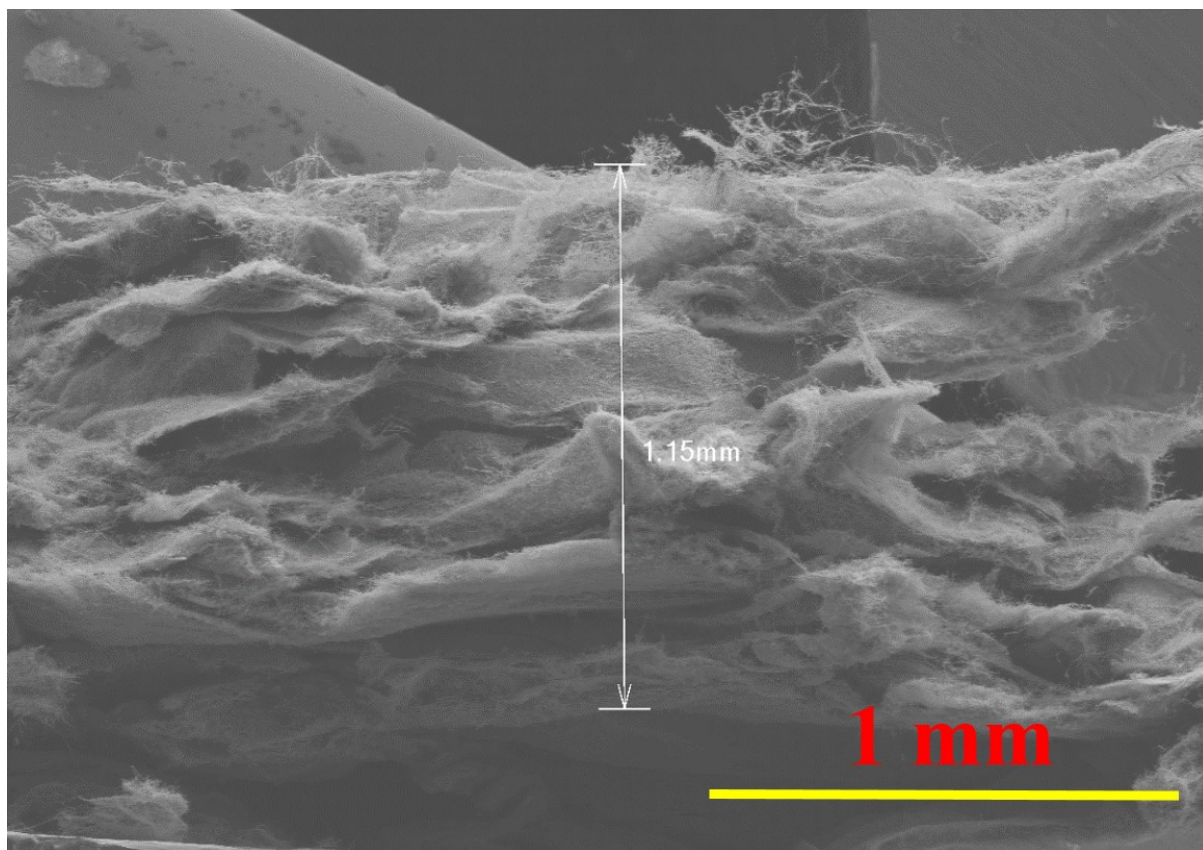

**Figure S4.** Cross-section image showing thickness of the  $\text{Na}^+$ -LBL 3D-CNF-35 electrode

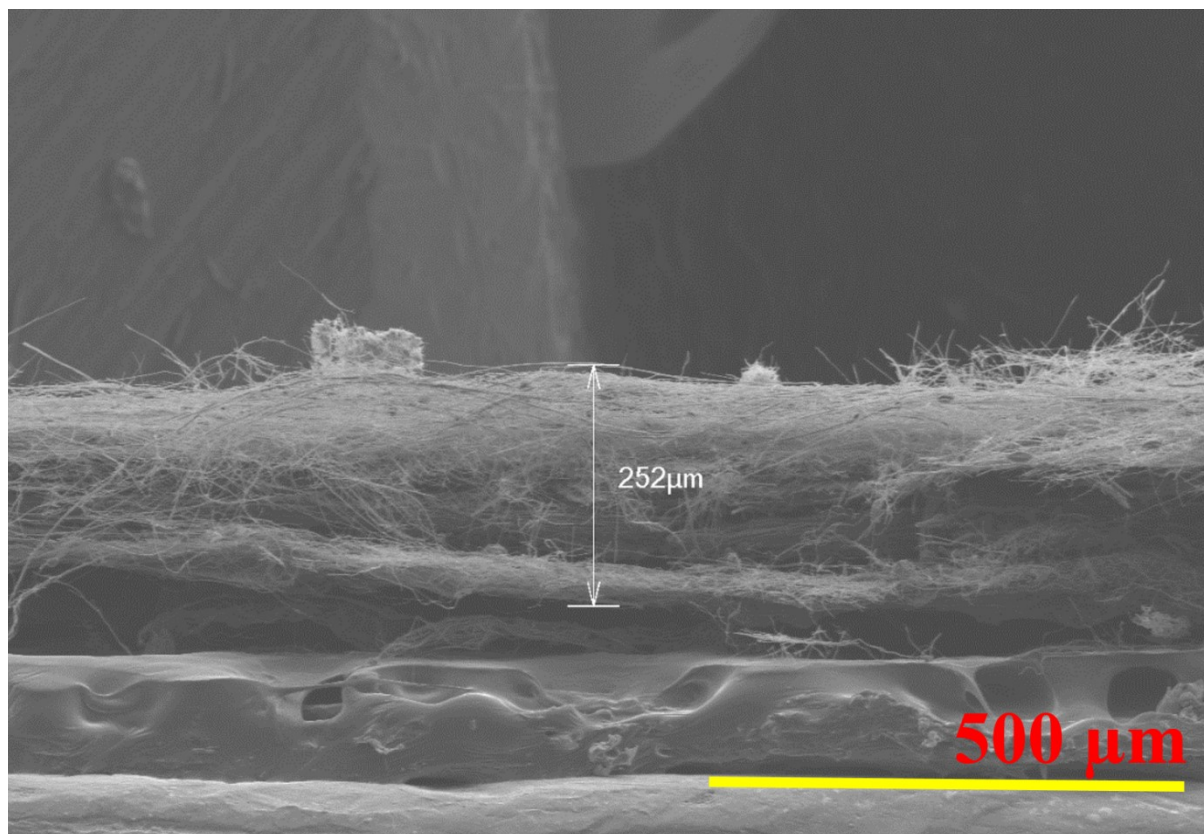

**Figure S5.** Cross-section showing thickness of the Na<sup>+</sup>-LBL 3D-CNF-10 electrode

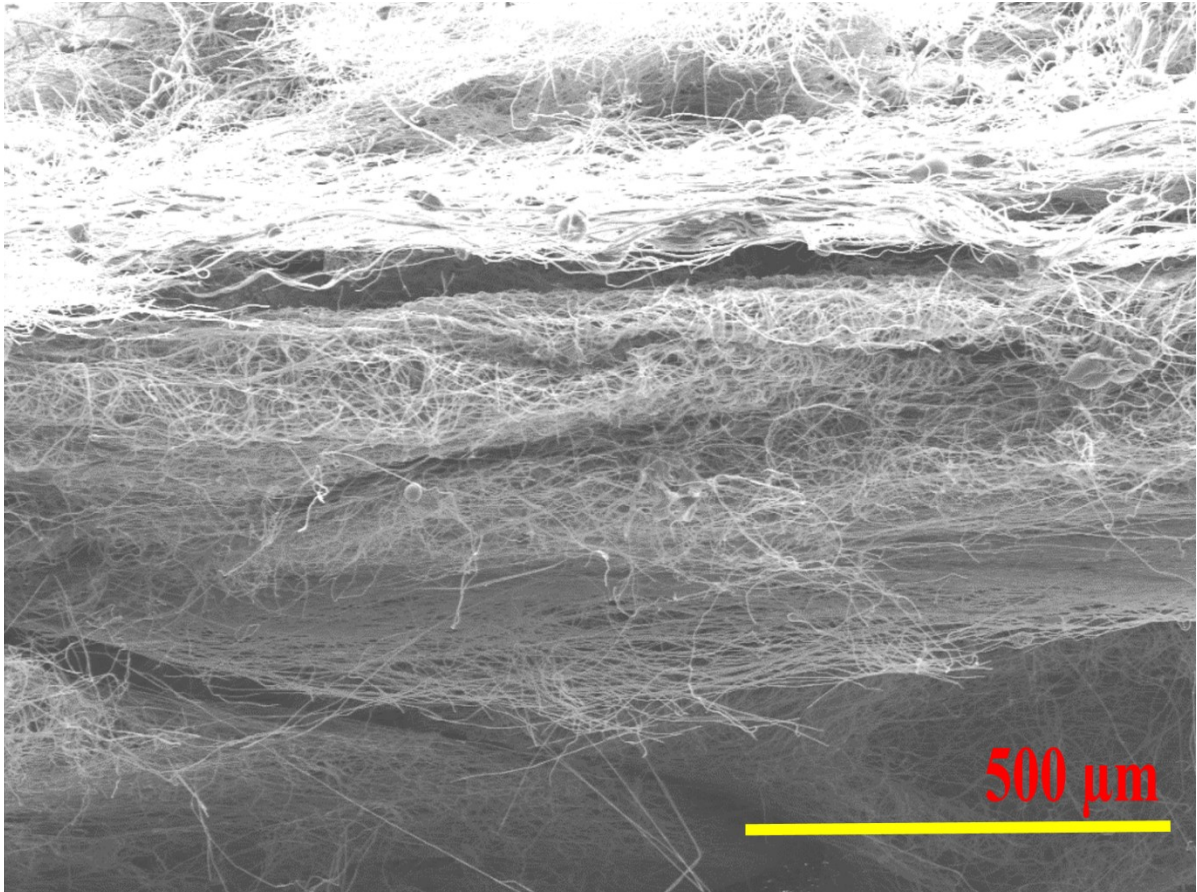

**Figure S6.** Cross-section showing thickness of the Na<sup>+</sup>-LBL 3D-CNF-20 electrode.

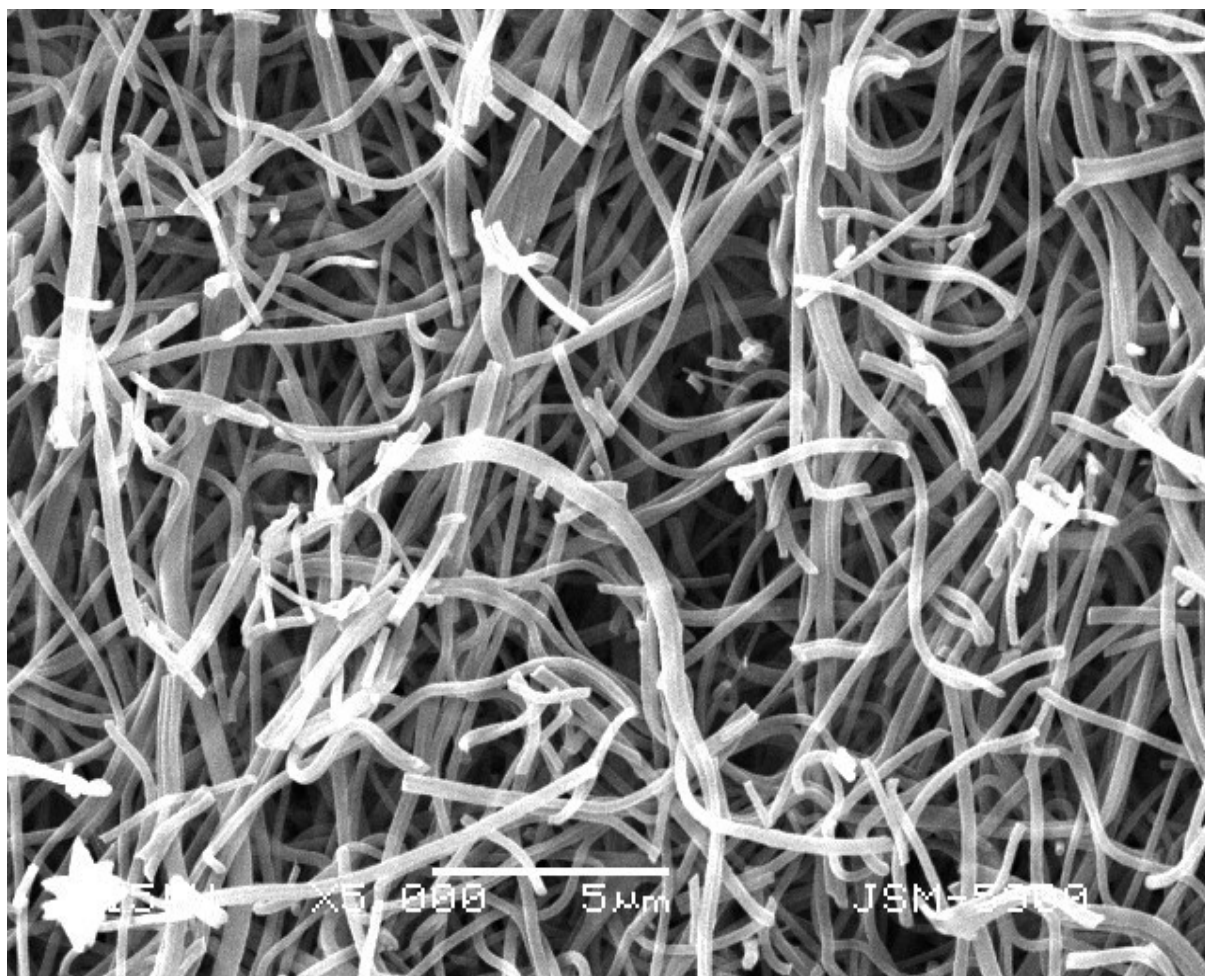

*Figure S7. Surface morphology of pristine 2D-CNFs.*



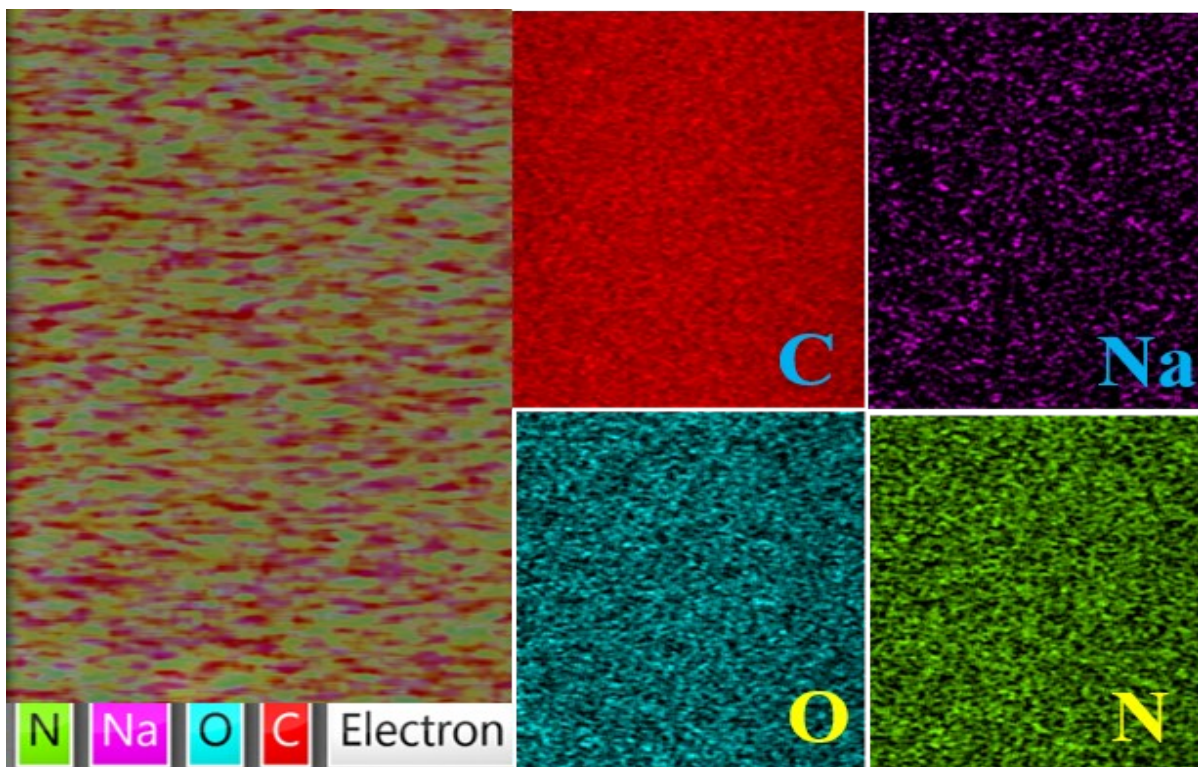

*Figure S8. Color mapping of  $\text{Na}^+$ -LBL 3D-CNF-35 electrode.*

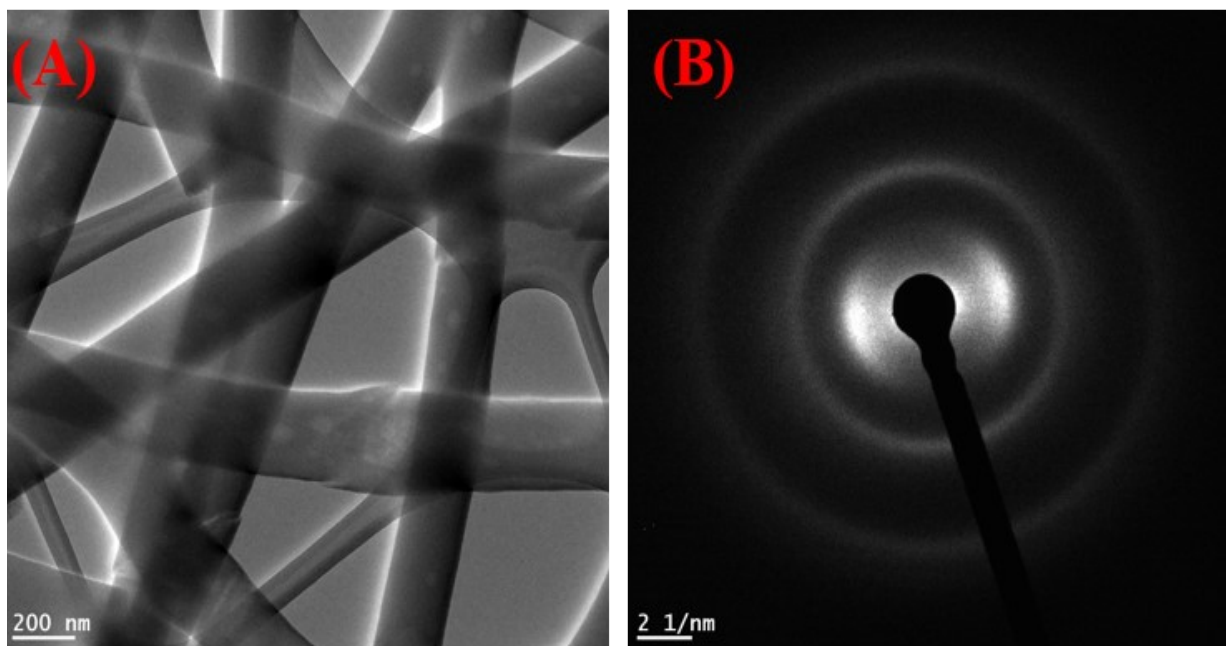

**Figure S9.** TEM (A) and SAED images of LBL 3D-CNF-35 before electroreduction technique .

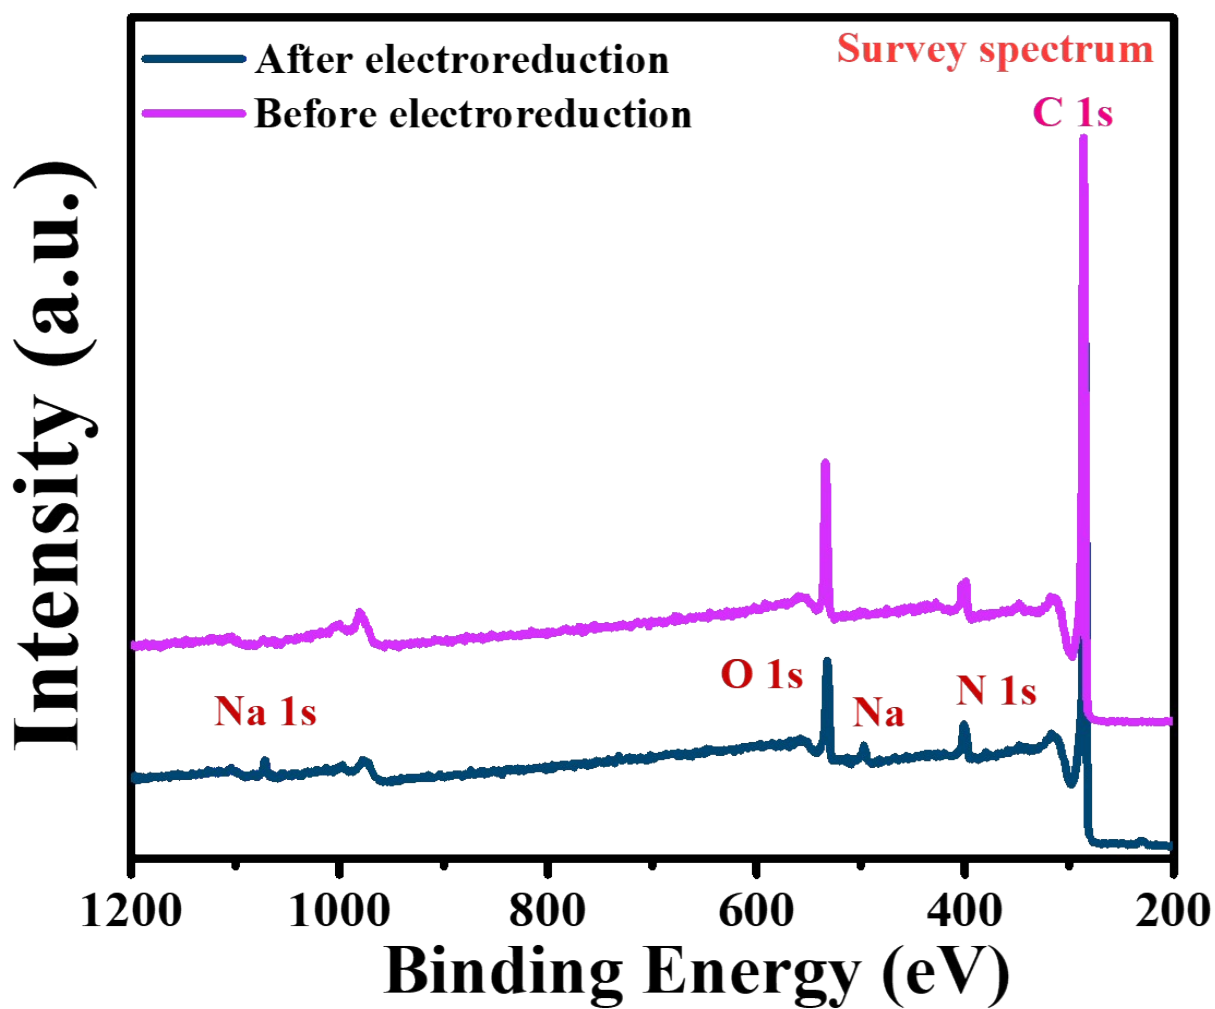

*Figure S10. Survey spectrum of LBL 3D-CNF-35 electrode before and after electroreduction technique.*

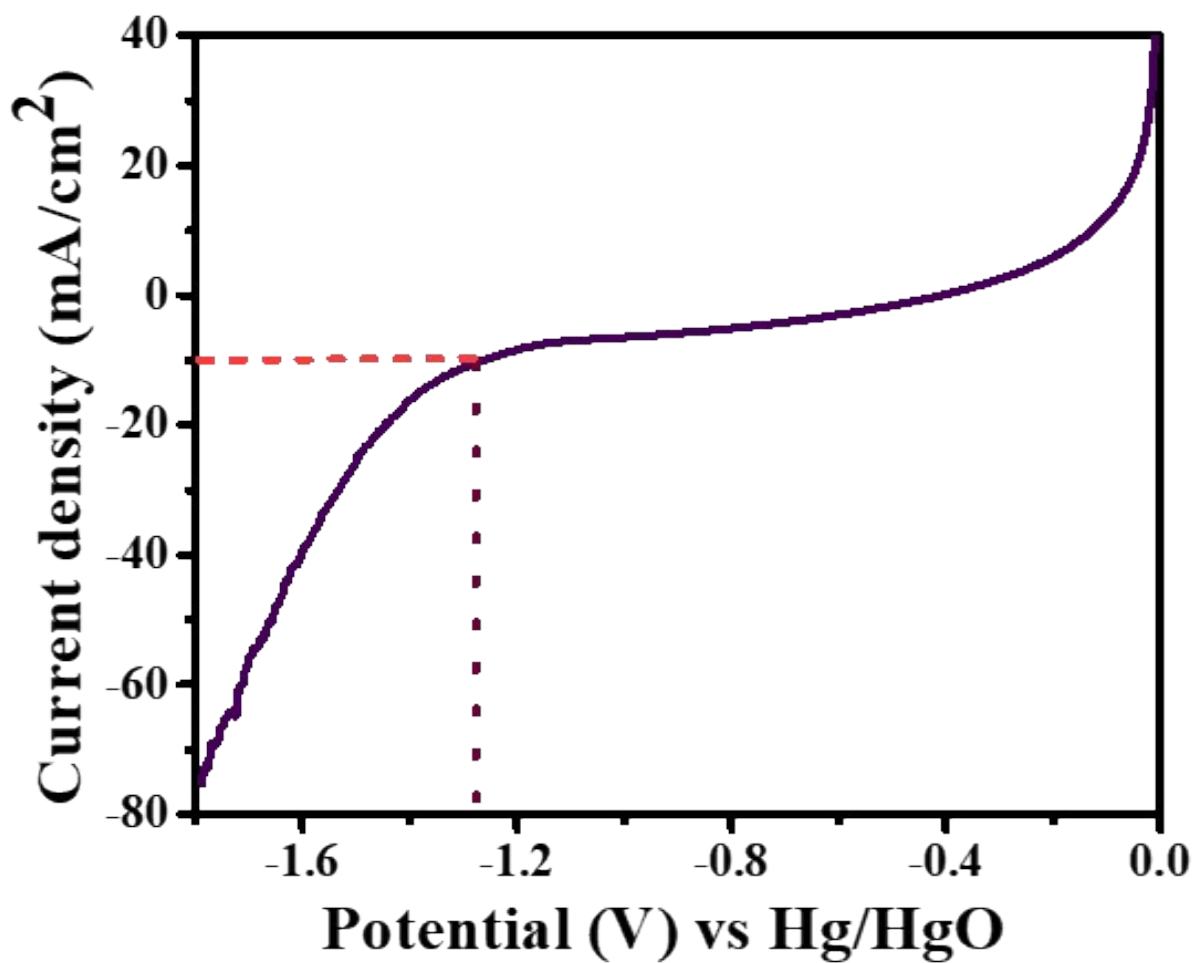

*Figure S11. Linear sweep voltammetry test of Na<sup>+</sup>-LBL 3D-CNF-35 electrode at 10 mV/s scan rate, which indicates the standard potential for hydrogen (H<sub>2</sub>) evolution.*

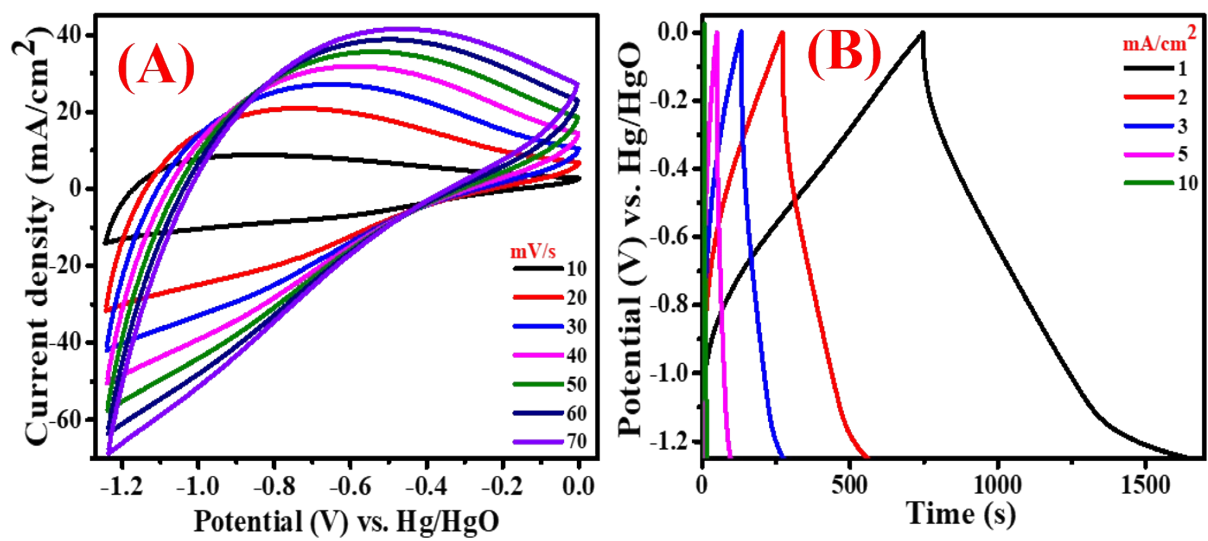

**Figure S12.** CV (A) and GCD (B) curves of  $\text{Na}^+$ -LBL 3D-CN-10 electrode at different scan rates and current densities.

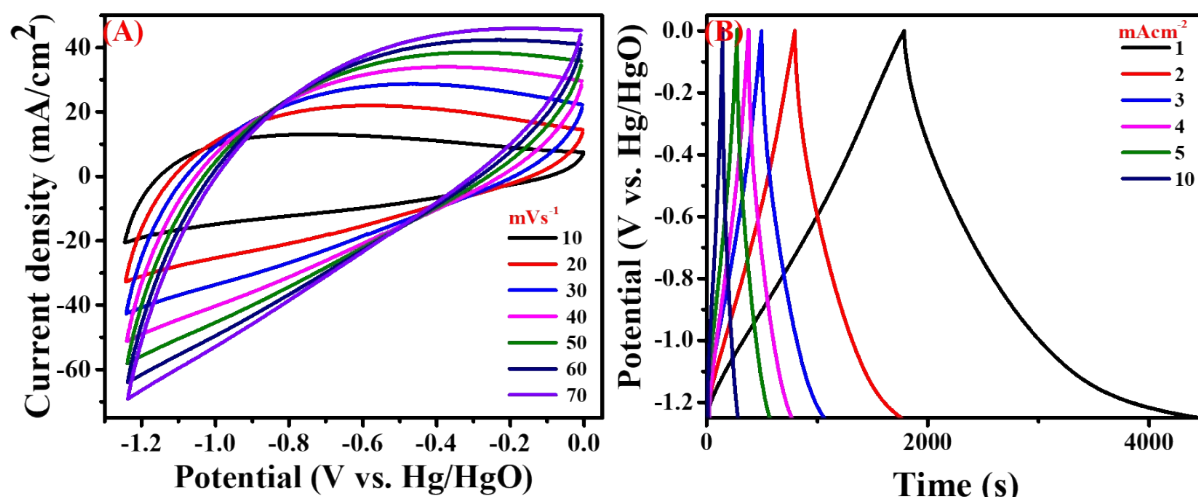

**Figure S13.** CV (A) and GCD (B) curves of Na<sup>+</sup>-LBL 3D-CN-20 electrode at different scan rates and current densities.

**Table S1.** A comparative study showing electrochemical performances of Na<sup>+</sup>-LBL 3D-CNF-35 electrode with reported literatures

| S.N. | Materials                                          | Loading mass (mg) | Specific capacitance (Fg <sup>-1</sup> )           | Working potential (V) | References       |
|------|----------------------------------------------------|-------------------|----------------------------------------------------|-----------------------|------------------|
| 1    | Activated wood carbon                              | 30                | 118 Fg <sup>-1</sup>                               | -0.9 – 0.0            | 1                |
| 2    | Carbon//metal oxide composite                      | 13.4              | 2098 mFcm <sup>-2</sup>                            | 0 – 0.6               | 2                |
| 3    | Activated carbon fibers                            | 10 ± 1            | 161 Fg <sup>-1</sup>                               | 0 - 1                 | 3                |
| 4    | CNT/MnO <sub>2</sub> /graphene                     | 9.1               | 3.38 Fcm <sup>-2</sup>                             | 0 - 1                 | 4                |
| 5    | N-doped layered porous carbon                      | 17.7              | 161 Fg <sup>-1</sup>                               | -1 – 0                | 5                |
| 6    | A PPyNP/ <i>f</i> -CNT                             | 14                | 176.3 mFcm <sup>-3</sup>                           | -0.2 – 0.6            | 6                |
| 7    | 3D lower structured graphene                       | 11.16             | 103.6 Fg <sup>-1</sup>                             | 0 – 1                 | 7                |
| 8    | Highly dense mesoporous carbon                     | 11.5              | 186 Fg <sup>-1</sup>                               | 0 – 1                 | 8                |
| 9    | Electrolyte-mediated chemically converted graphene | 10                | 1570 mFcm <sup>-2</sup>                            | 0 – 1                 | 9                |
| 10   | <b>Na<sup>+</sup>-LBL 3D-CNF</b>                   | <b>35</b>         | <b>170 Fg<sup>-1</sup> (5.93 Fcm<sup>-2</sup>)</b> | <b>-1.25 - 0</b>      | <b>This work</b> |

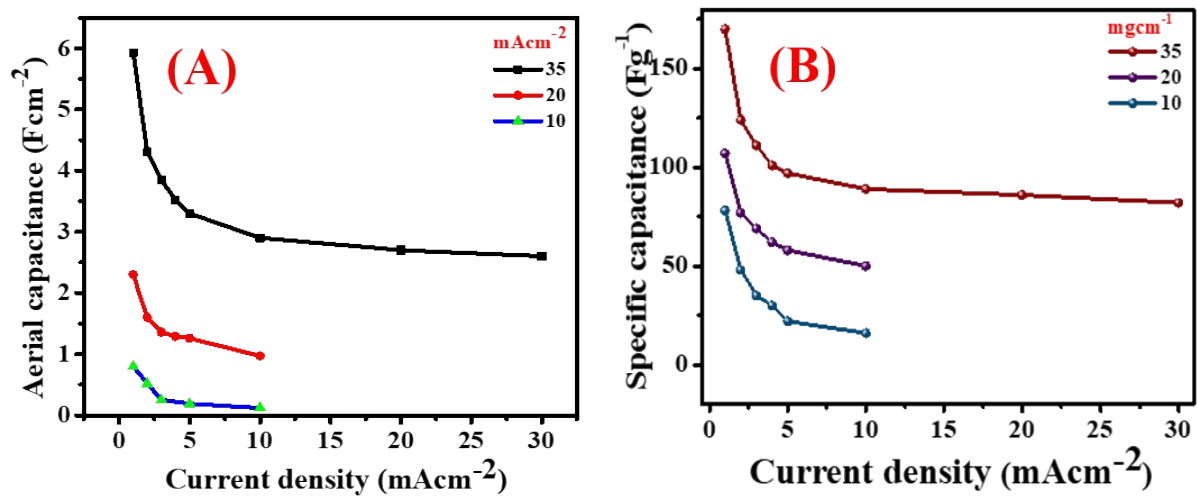

*Figure S14. Relation between aerial (A) and gravimetric (B) capacitances and current density.*

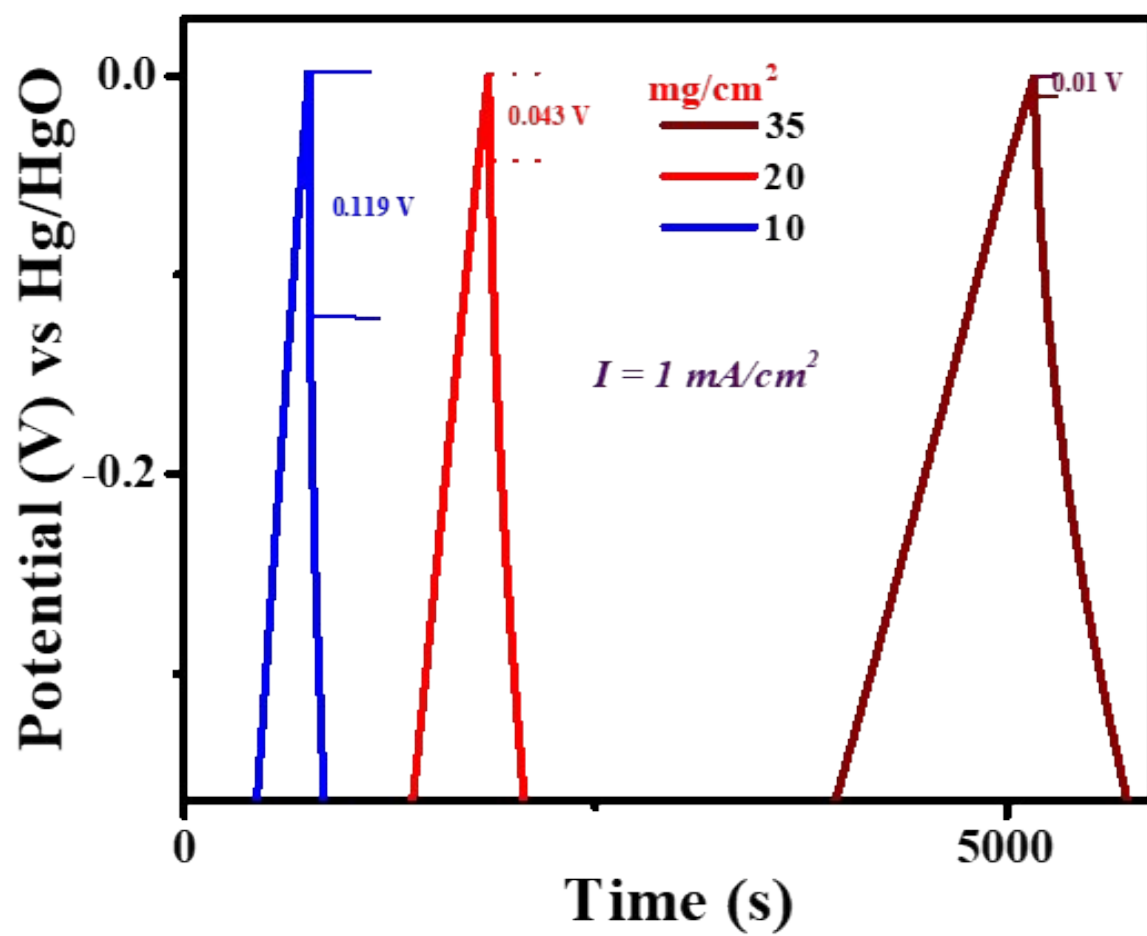

Figure S15. IR drop of  $\text{Na}^+$ -LBL 3D-CNFs electrodes at different mass loading 10, 20, and  $35 \text{ mgcm}^{-2}$  at a current density of  $1 \text{ mAcm}^{-2}$ .



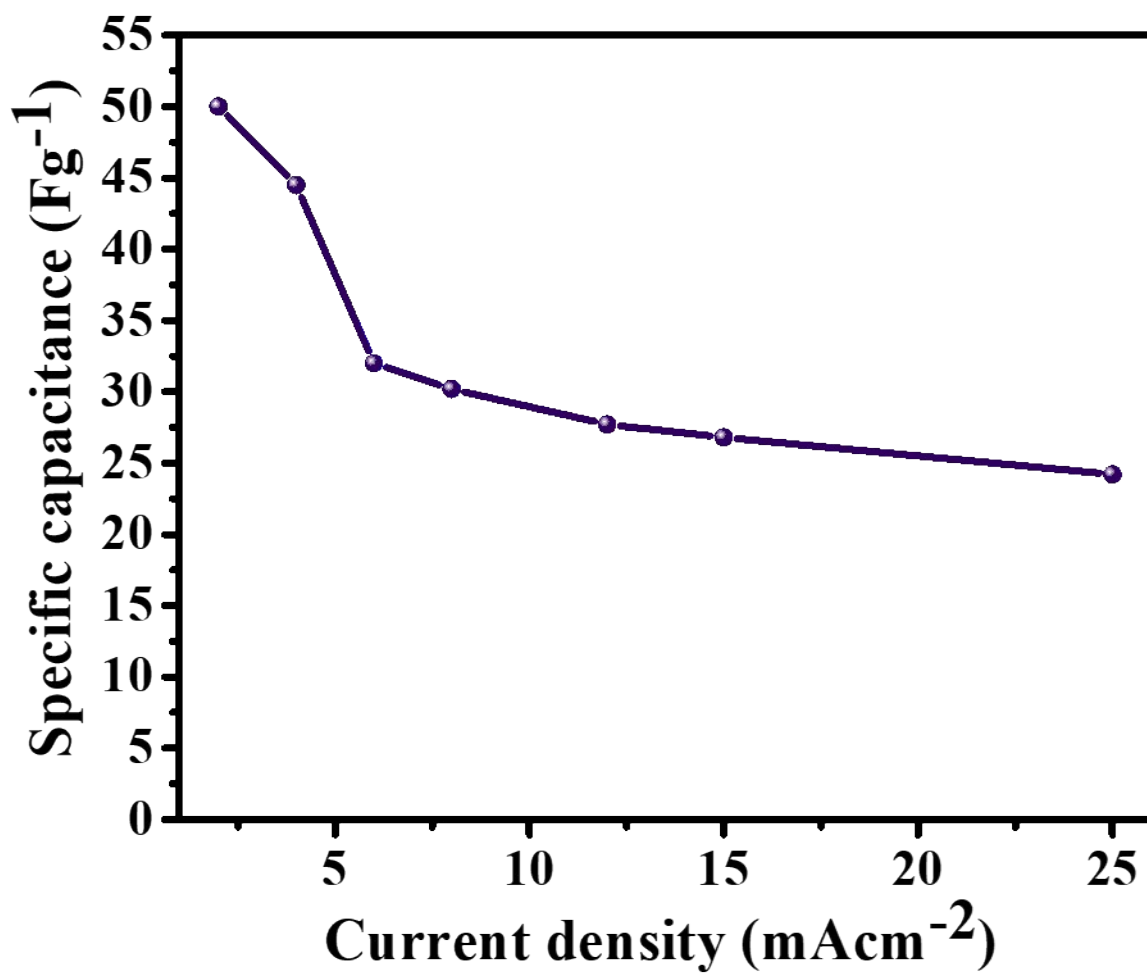

*Figure S16. Relation between specific capacitance and current density of symmetric device*

**Table S2:** A comparative study showing Energy and Power density of the carbon-based symmetric supercapacitors.

| No. | Electrode materials | Current density (mA/cm <sup>2</sup> or A/g) | Energy density (1922 $\mu\text{Whcm}^{-2}$ /Whkg <sup>-1</sup> ) | Power density (1922 $\mu\text{Wcm}^{-2}$ /W/kg) | Weight of electrode materials (mg/cm <sup>2</sup> ) | Ref. |
|-----|---------------------|---------------------------------------------|------------------------------------------------------------------|-------------------------------------------------|-----------------------------------------------------|------|
| 1   | ZTC-300             | 1.25 A/g                                    | 7.5                                                              | 625                                             | -                                                   | 10   |
| 2   | 800 AC              | 0.3 A/g                                     | 3                                                                | 220                                             |                                                     | 11   |
| 3   | PCN-900             | 0.1 A/g                                     | 8.02                                                             | 250                                             |                                                     | 12   |
| 4   | NOCS-1/10           | 0.5 A/g                                     | 4.3                                                              | 250                                             |                                                     | 13   |
| 5   | a-CSN/EG-10         | 0.3 A/g                                     | 7.3                                                              | 500                                             |                                                     | 14   |
| 6   | ACG-200             | 1 A/g                                       | 7.5                                                              | 200                                             |                                                     | 15   |
| 7   | 200-HTC-800-3       | 0.4 A/g                                     | 8.11                                                             | 400                                             |                                                     | 16   |
| 8   | N-OMCN@GN           | 1 A/g                                       | 6.68                                                             | 250                                             |                                                     | 17   |
| 9   | MOLC                | 0.5 A/g                                     | 3.85                                                             | 27.7                                            | 8                                                   | 18   |
| 10  | HGOCN-A             | 0.5 A/g                                     | 4.8                                                              | 5000                                            |                                                     | 19   |
| 11  | CPC                 | 1 A/g                                       | 6.45                                                             |                                                 | 20                                                  | 20   |
| 12  | L-CAs               | 1 A/g                                       | 26.25                                                            | 1000                                            |                                                     | 21   |
| 13  | BHNC                | 1 A/g                                       | 6.1                                                              | 26000                                           |                                                     | 22   |
| 14  | RCFs                | 0.2 A/g                                     | 6.1                                                              | 1600                                            |                                                     | 23   |
| 15  | N/O-CNS             | 0.5 A/g                                     | 6.5                                                              | 80                                              |                                                     | 24   |
| 16  | N/S/O-3D PC         | 0.3                                         | 8.4                                                              | -                                               |                                                     | 25   |
| 17  | PCNFs               | 1 A/g                                       | 24.4                                                             | 8800                                            |                                                     | 26   |
| 18  | NPSO                | 0.5 A/g                                     | 23.17                                                            | 500                                             |                                                     | 27   |
| 19  | NHPCs-800           | 0.5 A/g                                     | 23.8                                                             | 402                                             |                                                     |      |
| 20  | N/S-PCNS1-1         | 0.2 A/g                                     | 21                                                               | 180                                             |                                                     | 28   |

|    |                                                                   |                            |                                                                   |                                                                      |                                 |                      |
|----|-------------------------------------------------------------------|----------------------------|-------------------------------------------------------------------|----------------------------------------------------------------------|---------------------------------|----------------------|
| 21 | PCAs                                                              | 0.5 A/g                    | 19.74                                                             | 500                                                                  |                                 | 29                   |
| 22 | PDD-DCNT                                                          | 1 A/g                      | 19.1                                                              | 800                                                                  |                                 | 30                   |
| 23 | <b>Na<sup>+</sup>-LBL 3D-CNF-35//Na<sup>+</sup>-LBL 3D-CNF-35</b> | <b>1 mAcm<sup>-2</sup></b> | <b>1922<br/>μWhcm<sup>-2</sup><br/>(27<br/>Whkg<sup>-1</sup>)</b> | <b>3979<br/>1922<br/>μWcm<sup>-2</sup><br/>(57 Wkg<sup>-1</sup>)</b> | <b>35<br/>mgcm<sup>-2</sup></b> | <b>This<br/>work</b> |

## References

1. C. Chen, Y. Zhang, Y. Li, J. Dai, J. Song, Y. Yao, Y. Gong, I. Kierzewski, J. Xie and L. Hu, *Energy & Environmental Science*, 2017, **10**, 538-545.
2. X. Zhang, J. Luo, P. Tang, X. Ye, X. Peng, H. Tang, S.-G. Sun and J. Fransaer, *Nano Energy*, 2017, **31**, 311-321.
3. M. Vijayakumar, R. Santhosh, J. Adduru, T. N. Rao and M. Karthik, *Carbon*, 2018, **140**, 465-476.
4. L. Lyu, K.-d. Seong, J. M. Kim, W. Zhang, X. Jin, D. K. Kim, Y. Jeon, J. Kang and Y. Piao, *Nano-Micro Letters*, 2019, **11**, 88.
5. L.-z. Sheng, Y.-y. Zhao, B.-q. Hou, Z.-p. Xiao, L.-l. Jiang and Z.-j. Fan, *New Carbon Materials*, 2021, **36**, 179-188.
6. J. Parayangattil Jyothibas, M.-Z. Chen and R.-H. Lee, *ACS Omega*, 2020, **5**, 6441-6451.
7. L. Chang, W. Wei, K. Sun and Y. H. Hu, *Journal of Materials Chemistry A*, 2015, **3**, 10183-10187.
8. L. Chang, K. Sun and Y. H. Hu, *ACS Applied Materials & Interfaces*, 2018, **10**, 33162-33169.
9. X. Yang, C. Cheng, Y. Wang, L. Qiu and D. Li, *Science*, 2013, **341**, 534.
10. C. Teng, Y. Han, G. Fu, J. Hu, H. Zheng, X. Lu and J. Jiang, *Journal of Materials*

- Chemistry A*, 2018, **6**, 18938-18947.
11. W. Liu, S. Zhang, S. U. Dar, Y. Zhao, R. Akram, X. Zhang, S. Jin, Z. Wu and D. Wu, *Carbon*, 2018, **129**, 420-427.
  12. G. Zhu, L. Ma, H. Lv, Y. Hu, T. Chen, R. Chen, J. Liang, X. Wang, Y. Wang, C. Yan, Z. Tie, Z. Jin and J. Liu, *Nanoscale*, 2017, **9**, 1237-1243.
  13. R. Zhang, X. Jing, Y. Chu, L. Wang, W. Kang, D. Wei, H. Li and S. Xiong, *Journal of Materials Chemistry A*, 2018, **6**, 17730-17739.
  14. Y. Liu, X. Qiu, X. Liu, Y. Liu and L.-Z. Fan, *Journal of Materials Chemistry A*, 2018, **6**, 8750-8756.
  15. Z. Chen, K. Liu, S. Liu, L. Xia, J. Fu, X. Zhang, C. Zhang and B. Gao, *Electrochimica Acta*, 2017, **237**, 102-108.
  16. Y. Wu, J.-P. Cao, X.-Y. Zhao, Z.-Q. Hao, Q.-Q. Zhuang, J.-S. Zhu, X.-Y. Wang and X.-Y. Wei, *Electrochimica Acta*, 2017, **252**, 397-407.
  17. M. Zhao, X. Cui, Y. Xu, L. Chen, Z. He, S. Yang and Y. Wang, *Nanoscale*, 2018, **10**, 15379-15386.
  18. M. Shaibani, S. J. D. Smith, P. C. Banerjee, K. Konstas, A. Zafari, D. E. Lobo, M. Nazari, A. F. Hollenkamp, M. R. Hill and M. Majumder, *Journal of Materials Chemistry A*, 2017, **5**, 2519-2529.
  19. Z. Jia, C. Chen, G. Xu, X. Wei and L. Yang, *ChemElectroChem*, 2018, **5**, 546-557.
  20. W. Tian, J. Zhu, Y. Dong, J. Zhao, J. Li, N. Guo, H. Lin, S. Zhang and D. Jia, *Carbon*, 2020, **161**, 89-96.
  21. Y. Zhang, C. Zhao, W. K. Ong and X. Lu, *ACS Sustainable Chemistry & Engineering*, 2019, **7**, 403-411.
  22. W. Tian, Q. Gao, Y. Tan, K. Yang, L. Zhu, C. Yang and H. Zhang, *Journal of Materials*

- Chemistry A*, 2015, **3**, 5656-5664.
23. Y. Zhou, Z. Zhu, C. Zhao, K. Zhang, B. Wang, C. Zhao and G. Chen, *ACS Sustainable Chemistry & Engineering*, 2019, **7**, 5095-5102.
  24. Z. Song, D. Zhu, L. Li, T. Chen, H. Duan, Z. Wang, Y. Lv, W. Xiong, M. Liu and L. Gan, *Journal of Materials Chemistry A*, 2019, **7**, 1177-1186.
  25. W. Yang, W. Yang, A. Song, L. Gao, L. Su and G. Shao, *Journal of Power Sources*, 2017, **359**, 556-567.
  26. T. F. Zhang, Q. X. Xia, Z. Wan, J. M. Yun, Q. M. Wang and K. H. Kim, *Chemical Engineering Journal*, 2019, **360**, 1310-1319.
  27. S. Lei, L. Chen, W. Zhou, P. Deng, Y. Liu, L. Fei, W. Lu, Y. Xiao and B. Cheng, *Journal of Power Sources*, 2018, **379**, 74-83.
  28. Y. Li, G. Wang, T. Wei, Z. Fan and P. Yan, *Nano Energy*, 2016, **19**, 165-175.
  29. P. Hao, Z. Zhao, J. Tian, H. Li, Y. Sang, G. Yu, H. Cai, H. Liu, C. P. Wong and A. Umar, *Nanoscale*, 2014, **6**, 12120-12129.
  30. Y. He, X. Yang, N. An, X. Wang, Y. Yang and Z. Hu, *New Journal of Chemistry*, 2019, **43**, 1688-1698.
